# Supplementary material
Source: publisher site journal article supplement (https://static.cambridge.org/content/id/urn:cambridge.org:id:article:S1092852920001376/resource/name/S1092852920001376supp001.docx)
Supplement: Supplementary file 1 [file S1092852920001376supp001.docx]

## Supplementary Table 1. Proportion of Patients With Shift Categories in Lipid and Glycemic Parameters From Baseline to Any Postbaseline Visit

| Shift Category | All Patients, n/m (%)a |
| --- | --- |
| Total cholesterol, fasting, mg/dL | |
| Normal (<200) to high (≥240) | 14/158 (8.9) |
| Borderline (≥200 and <240) to high (≥240) | 20/65 (30.8) |
| Increase ≥40 mg/dL | 63/251 (25.1) |
| HDL cholesterol, fasting, mg/dL | |
| Normal (≥40) to low (<40) | 54/203 (26.6) |
| Decrease ≥20 mg/dL | 24/251 (9.6) |
| LDL cholesterol, fasting, mg/dL | |
| Normal (<100) to high (≥160) | 4/73 (5.5) |
| Borderline (≥100 and <160) to high (≥160) | 33/147 (22.4) |
| Increase ≥30 mg/dL | 77/251 (30.7) |
| Triglycerides, fasting, mg/dL | |
| Normal (<150) to high (≥200) | 27/170 (15.9) |
| Borderline (≥150 and <200) to high (≥200) | 25/47 (53.2) |
| Increase ≥50 mg/dL | 101/251 (40.2) |
| Glucose, fasting, mg/dL | |
| Normal (<100) to high (≥126) | 15/198 (7.6) |
| Impaired (≥100 and <126) to high (≥126) | 9/48 (18.8) |
| HbA1c, % | |
| Baseline <5.7% to postbaseline ≥5.7% | 51/179 (28.5) |
| Baseline <5.7% to postbaseline ≥6.5% | 1/179 (0.6) |

HbA1c, glycosylated hemoglobin; HDL, high-density lipoprotein; LDL, low-density lipoprotein.

an is the number of patients who met the shift category; m is the number of patients who met the baseline criteria per shift category and have ≥1 nonmissing postbaseline value.
